# Supplementary material for: In Vitro High-Throughput Genotoxicity Testing Using γH2AX Biomarker, Microscopy and Reproducible Automatic Image Analysis in ImageJ—A Pilot Study with Valinomycin
Source: MDPI journal article supplement (doi:10.3390/toxins15040263), 2023-04-01
Supplement: s1 [file s1]

## Supplementary Materials

**Table S1:** p-values after 4h treatment.

| Cell line | Sample | Well 1    | Well 2    | Well 3    |
|-----------|--------|-----------|-----------|-----------|
| CHO-K1    | Ctrl   | 0         | 0         | 0         |
|           | Val30  | 3.65E-132 | 3.65E-132 | 7.43E-205 |
|           | Val15  | 3.90E-107 | 2.97E-177 | 2.20E-155 |
| HeLa      | Ctrl   | 0         | 0         | 0         |
|           | Val30  | 0         | 0         | 0         |
|           | Val15  | 0         | 0         | 0         |

**Table S2:** p-values after 24h treatment.

| Cell line | Sample | Well 1    | Well 2    | Well 3    |
|-----------|--------|-----------|-----------|-----------|
| CHO-K1    | Ctrl   | 4.84E-220 | 7.61E-309 | 5.07E-200 |
|           | Val30  | 7.44E-201 | 5.48E-186 | 2.57E-179 |
|           | Val15  | 2.74E-229 | 2.51E-301 | 2.91E-206 |
| HeLa      | Ctrl   | 0         | 0         | 0         |
|           | Val30  | 0         | 0         | 0         |
|           | Val15  | 0         | 0         | 0         |

Null hypothesis: Data comes from a normal distribution

If p-value < 0.001 then null hypothesis can be rejected.

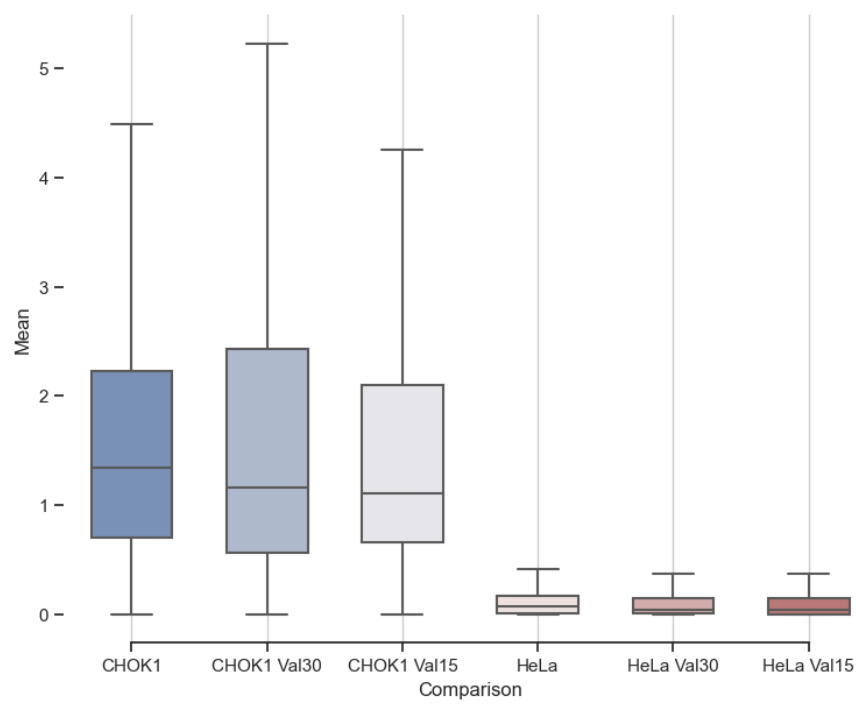

**Figure S1.** Mean brightness of detected ROI after 4 h. Error bars stand for interquartile range.

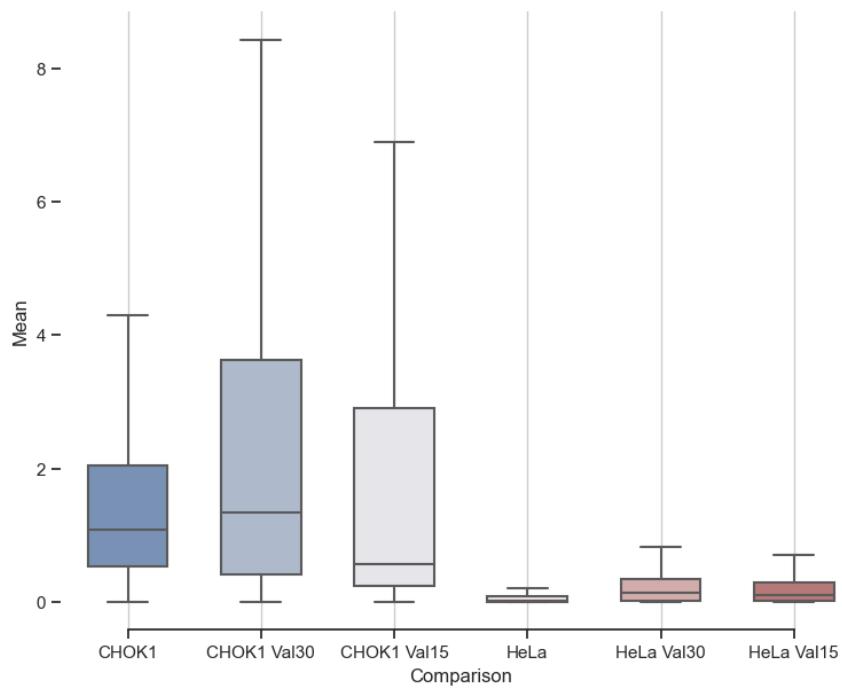

**Figure S2.** Mean brightness of detected ROI after 24 h. Error bars stand for interquartile range.
